# Supplementary material
Source: MDPI journal article supplement (https://www.mdpi.com/search?q=nutrients-12-01828)
Supplement: s001 [file nutrients-12-01828-s001.pdf]

---

## Supplementary Materials

**Supplemental Table S1. Nutritional composition of almonds and control snacks per 400 kcal isocaloric portions.** Values given as 20% of the estimated average requirement for energy (2000 kcal) for adult women.

| Nutrient         | Almonds | Average of sweet and savory<br>control snacks | Control snacks |        |
|------------------|---------|-----------------------------------------------|----------------|--------|
|                  |         |                                               | Sweet          | Savory |
| Energy, kcal     | 400     | 400                                           | 400            | 400    |
| Protein, %E      | 13.4    | 9.8                                           | 9.8            | 9.8    |
| Carbohydrate, %E | 13.2    | 54.1                                          | 54.3           | 53.8   |
| Starch, %E       | -       | 38.7                                          | 24.5           | 52.9   |
| Sugars, %E       | 2.3     | 15.1                                          | 29.7           | 0.4    |
| Fibre, g         | 9.3     | 2.1                                           | 1.3            | 2.8    |
| Fat, %E          | 73.6    | 36.5                                          | 35.8           | 37.1   |
| SFA, g           | 5.6     | 12.8                                          | 12.6           | 12.8   |
| MUFA, g          | 47.9    | 16.0                                          | 15.8           | 16.0   |
| PUFA, g          | 16.0    | 5.6                                           | 5.4            | 5.9    |
| Sodium, mg       | <2.5    | 452.1                                         | 187.4          | 716.8  |
| Potassium, mg    | 463.7   | 162.8                                         | 145.9          | 179.6  |
| Calcium, mg      | 164.7   | 130.1                                         | 46.1           | 214.1  |
| Magnesium, mg    | 181.7   | 19.0                                          | 15.4           | 22.6   |
| Vitamin E, mg    | 14.3    | 1.3                                           | 1.1            | 1.4    |

Supplemental Figure S1. CONSORT Flow Diagram

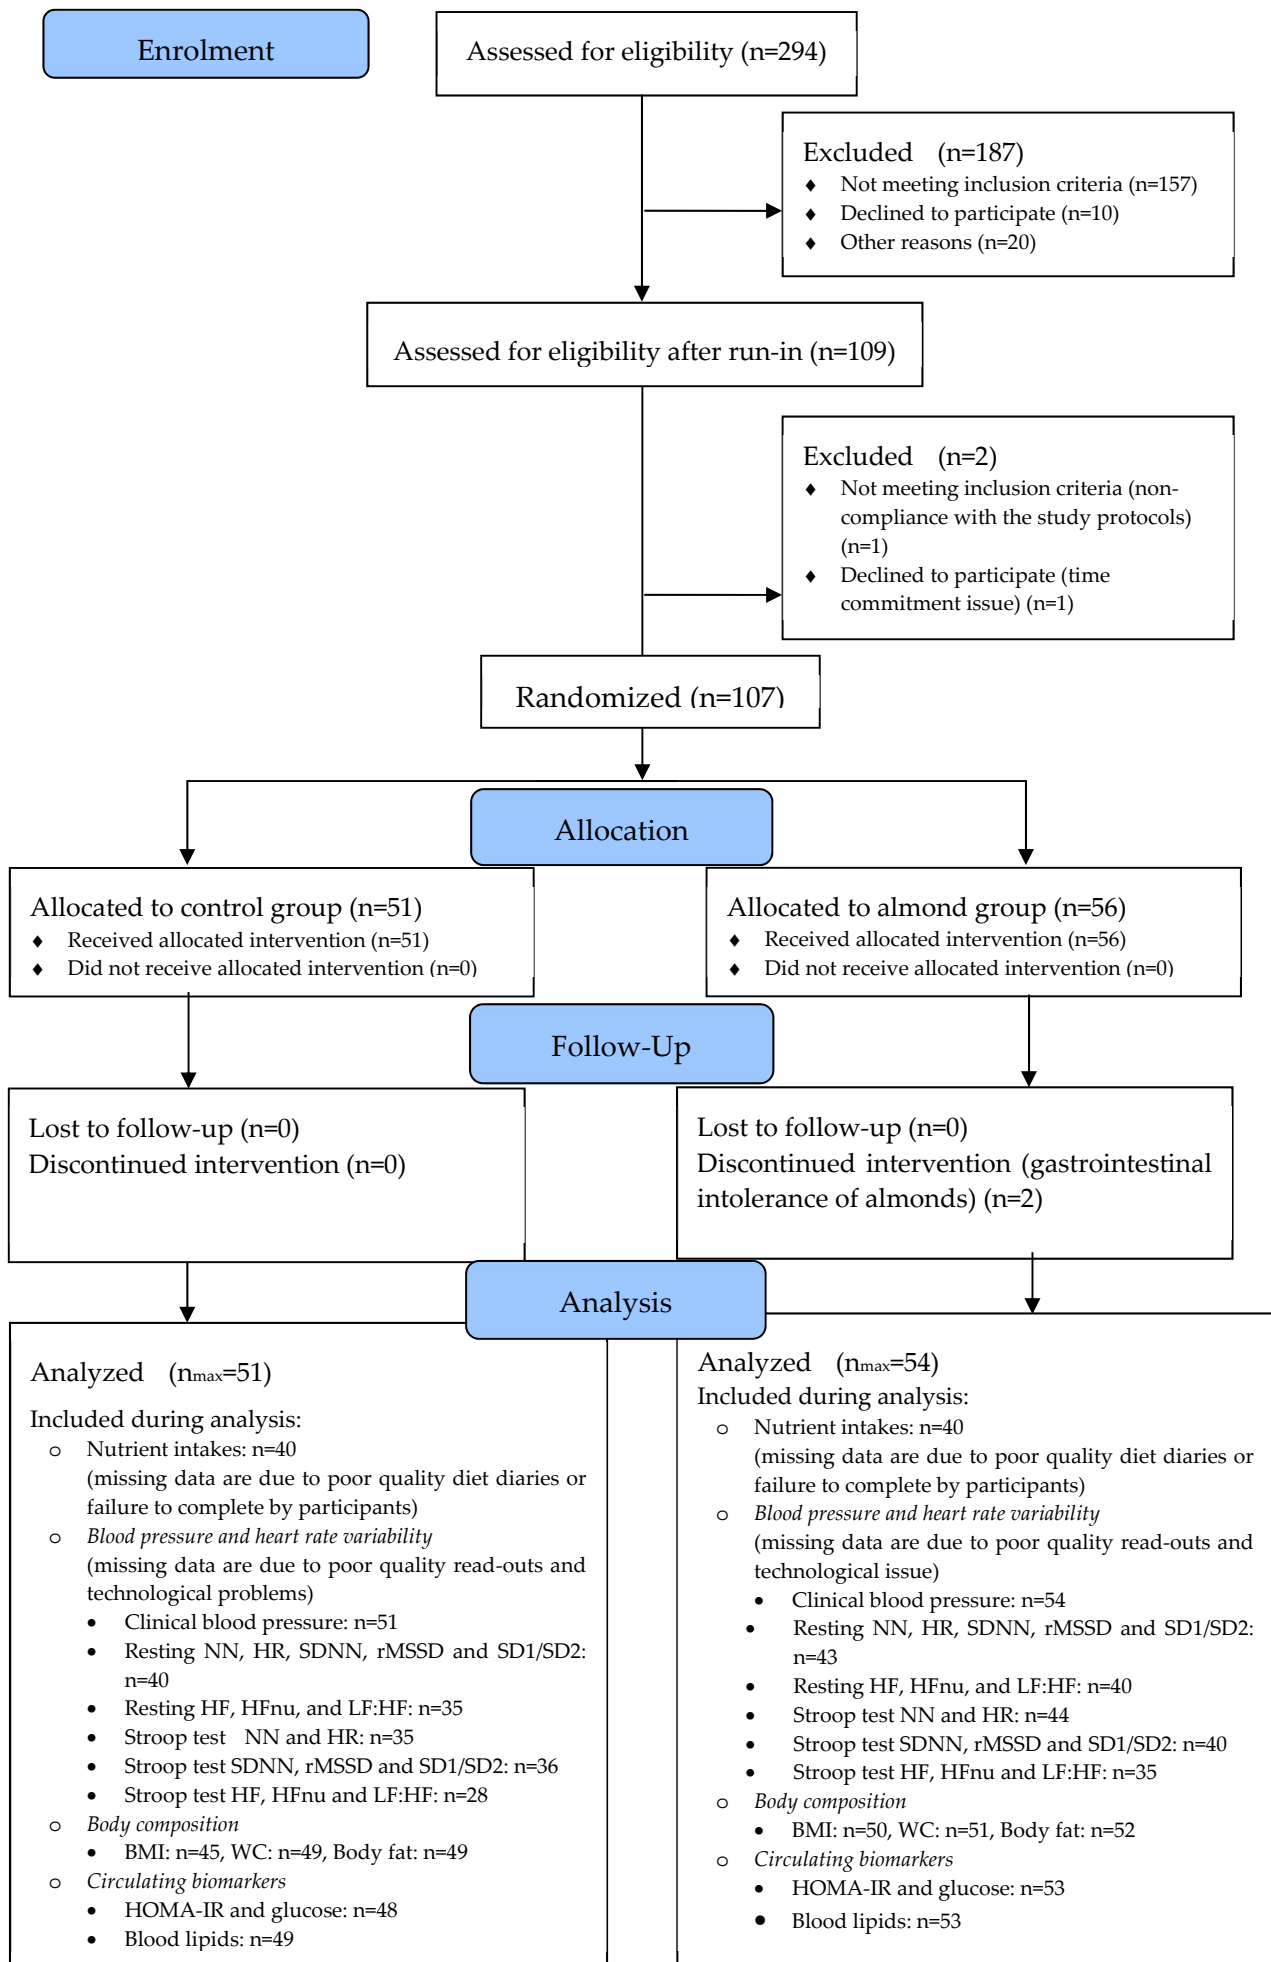

**Supplemental Table S2. Body composition, clinical blood pressure and circulating biomarkers of cardiometabolic risk following randomization to almond and control snacks.**

|                        | Control, n <sub>max</sub> = 51 <sup>1</sup> |                     | Almonds, n <sub>max</sub> = 54 <sup>1</sup> |                      | Main comparison between groups <sup>3</sup> |
|------------------------|---------------------------------------------|---------------------|---------------------------------------------|----------------------|---------------------------------------------|
|                        | Baseline <sup>2</sup>                       | Change              | Baseline <sup>2</sup>                       | Change               |                                             |
| BMI, kg/m <sup>2</sup> | 27.1 ± 4.4                                  | -0.2 (-0.4, 0.0)    | 27.2 ± 4.5                                  | 0.1 (-0.1, 0.3)      | 0.2 (-0.1, 0.5)                             |
| WC, cm                 | 93.3 ± 11.7                                 | 0.1 (-0.9, 1.2)     | 94.1 ± 12.2                                 | -0.6 (-1.6, 0.5)     | -0.7 (-2.2, 0.8)                            |
| Body fat, %            | 31.1 ± 7.7                                  | -0.5 (-1.1, 0.0)    | 32.2 ± 7.7                                  | 0.3 (-0.3, 0.8)      | 0.8 (-0.0, 1.6)                             |
| cSBP, mmHg             | 127.8 ± 12.9                                | -5.2 (-7.9, -2.6)   | 127.3 ± 19.3                                | -6.3 (-8.9, -3.7)    | -1.0 (-4.7, 2.6)                            |
| cDBP, mmHg             | 84.6 ± 7.9                                  | -3.2 (-5.1, -1.3)   | 85.5 ± 10.6                                 | -3.5 (-5.3, -1.6)    | 0.2 (-2.9, 2.4)                             |
| TC, mmol/L             | 5.26 ± 1.13                                 | 0.03 (-0.15, 0.20)  | 5.40 ± 0.93                                 | -0.18 (-0.35, -0.02) | -0.21 (-0.45, 0.03)                         |
| TAG, mmol/L            | 1.17 (0.69)                                 | -0.11 (-0.20, 0.01) | 1.07 (0.73)                                 | -0.08 (-0.17, 0.02)  | 0.03 (-0.11, 0.16)                          |
| Non-HDL, mmol/L        | 3.92 ± 1.16                                 | 0.11 (-0.04, 0.26)  | 4.00 ± 0.98                                 | -0.11 (-0.25, 0.03)  | -0.22 (-0.42, -0.01) <sup>4</sup>           |
| LDL, mmol/L            | 3.63 ± 1.16                                 | 0.15 (0.01, 0.30)   | 3.74 ± 0.91                                 | -0.09 (-0.23, 0.05)  | -0.25 (-0.45, -0.04) <sup>4</sup>           |
| HDL, mmol/L            | 1.61 ± 0.45                                 | 0.04 (-0.04, 0.11)  | 1.66 ± 0.51                                 | -0.04 (-0.11, -0.03) | -0.08 (-0.18, 0.03)                         |
| TC:HDL                 | 3.45 ± 0.91                                 | -0.04 (-0.15, 0.07) | 3.47 ± 1.01                                 | -0.03 (-0.14, 0.07)  | 0.00 (-0.15, 0.16)                          |

Values of change and main comparison of the changes between groups are presented as mean (95% CI) generated from estimated marginal means from ANCOVA.

<sup>1</sup>Not all data were analysed due to technical problems and sample loss.

BMI: n = 45 (control) and 50 (almond).

WC: n = 49 (control) and 51 (almond).

Body fat: n = 49 (control) and 52 (almond).

TC, TAG, Non-HDL, LDL, HDL and TC:HDL: n = 49 (control) and 53 (almond).

<sup>2</sup>Median (IQR) for TAG data as they are non-normally distributed. Mean ± SD for other data that are normally distributed. Baseline biomarker values were not different between the two groups.

<sup>3</sup>ANCOVA, adjusted for baseline outcome value and baseline BMI (mean difference in change from baseline, almonds minus control); *P* < 0.05 indicating a significant difference.

<sup>4</sup>*p* < 0.05 indicating a significant difference for values of mean difference between two groups.

BMI, body mass index; WC, waist circumference; cSBP, clinical systolic blood pressure; cDBP, clinical diastolic blood pressure; TC, total cholesterol; TAG, triglycerides; LDL, low-density lipoprotein cholesterol; HDL, high-density lipoprotein cholesterol.
